# Supplementary material for: Understanding PM2.5 concentration and removal efficiency variation in urban forest park—Observation at human breathing height
Source: PeerJ. 2020 May 7;8:e8988. doi: 10.7717/peerj.8988 (PMC7211407; doi:10.7717/peerj.8988)
Supplement: Supplemental Information 1 [file peerj-08-8988-s001.xlsx]

## Sheet: Data of concentration
Spring					Summer					Autumn					Winter
Time	Concentration	Period	Aver Con	SD	Time	Concentration	Period	Aver Con	SD	Time	Concentration	Period	Aver Con	SD	Time	Concentration	Period	Aver Con	SD
07:00:00	15.4	7:00-9:30	12.975	1.4532	07:00:00	8.23	7:00-9:30	6.57688	1.29203	07:00:00	21.76	7:00-9:30	11.8544	5.03497	07:00:00	220.6	7:00-9:30	190.222	53.0009
07:10:00	14.76	9:30-12:00	10.6207	2.12383	07:10:00	8.09	9:30-12:00	2.85667	0.651478	07:10:00	20.44	9:30-12:00	6.53067	1.2639	07:10:00	226.1	9:30-12:00	119.857	6.94193
07:20:00	13.76	12:00-15:00	9.92069	1.64821	07:20:00	7.98	12:00-15:00	2.04278	0.335661	07:20:00	18.86	12:00-15:00	6.05611	0.954328	07:20:00	239.1	12:00-15:00	111.086	3.38301
07:30:00	13.12	15:00-18:00	11.8079	1.25677	07:30:00	7.33	15:00-18:00	1.51833	0.114904	07:30:00	16.75	15:00-18:00	9.24611	1.58581	07:30:00	236.99	15:00-18:00	175.727	58.3108
07:40:00	12.22				07:40:00	7.25				07:40:00	14.69				07:40:00	244.39
07:50:00	12.755				07:50:00	7.01				07:50:00	11.94				07:50:00	227.24
08:00:00	12.55				08:00:00	6.98				08:00:00	10.51				08:00:00	255.55
08:10:00	14.1183				08:10:00	7.01				08:10:00	10.52				08:10:00	219.755
08:20:00	14.4075				08:20:00	6.88				08:20:00	9.63				08:20:00	232.625
08:30:00	13.5075				08:30:00	7.22				08:30:00	8.85				08:30:00	167.165
08:40:00	14.2783				08:40:00	6.71				08:40:00	8.31				08:40:00	145.81
08:50:00	12.0067				08:50:00	5.92				08:50:00	7.64				08:50:00	150.045
09:00:00	10.7108				09:00:00	5.34				09:00:00	8.17				09:00:00	118.93
09:10:00	10.4508				09:10:00	4.49				09:10:00	7.75				09:10:00	121.475
09:20:00	11.2633				09:20:00	4.65				09:20:00	7.39				09:20:00	120.07
09:30:00	12.2917				09:30:00	4.14				09:30:00	6.46				09:30:00	117.7
09:40:00	12.5767				09:40:00	3.98				09:40:00	5.51				09:40:00	126.205
09:50:00	12.2475				09:50:00	4.06				09:50:00	5.08				09:50:00	140.8
10:00:00	11.9575				10:00:00	3.67				10:00:00	5.71				10:00:00	123.61
10:10:00	12.1583				10:10:00	3.35				10:10:00	5.51				10:10:00	113.145
10:20:00	12.0792				10:20:00	2.81				10:20:00	5.4				10:20:00	112.67
10:30:00	12.0942				10:30:00	2.36				10:30:00	5.43				10:30:00	114.5
10:40:00	12.2675				10:40:00	2.53				10:40:00	5.8				10:40:00	121.815
10:50:00	12.3892				10:50:00	2.98				10:50:00	6.19				10:50:00	119.895
11:00:00	11.4317				11:00:00	3.11				11:00:00	6.47				11:00:00	119.09
11:10:00	10.4617				11:10:00	2.72				11:10:00	7.08				11:10:00	121.38
11:20:00	9.55333				11:20:00	2.41				11:20:00	7.1				11:20:00	118.115
11:30:00	8.63583				11:30:00	2.27				11:30:00	7.2				11:30:00	117.945
11:40:00	7.5025				11:40:00	2.35				11:40:00	7.44				11:40:00	115.67
11:50:00	7.4				11:50:00	2.16				11:50:00	8.84				11:50:00	115.305
12:00:00	6.555				12:00:00	2.09				12:00:00	9.2				12:00:00	117.715
12:10:00	6.50917				12:10:00	2.08				12:10:00	8.97				12:10:00	114.77
12:20:00	6.36333				12:20:00	2.4				12:20:00	7.76				12:20:00	112.245
12:30:00	10.1192				12:30:00	2.18				12:30:00	6.88				12:30:00	113.455
12:40:00	12.8617				12:40:00	2.24				12:40:00	6.35				12:40:00	110.9
12:50:00	12.1208				12:50:00	2.15				12:50:00	5.99				12:50:00	107.595
13:00:00	11.645				13:00:00	2.09				13:00:00	6.14				13:00:00	106.22
13:10:00	10.6717				13:10:00	2.44				13:10:00	6.01				13:10:00	106.85
13:20:00	11.2742				13:20:00	2.49				13:20:00	5.92				13:20:00	106.845
13:30:00	10.7925				13:30:00	2.08				13:30:00	5.42				13:30:00	108.395
13:40:00	10.4783				13:40:00	2.09				13:40:00	5.45				13:40:00	108.165
13:50:00	9.45417				13:50:00	2.21				13:50:00	5.36				13:50:00	110.77
14:00:00	9.54417				14:00:00	2.55				14:00:00	5.3				14:00:00	110.365
14:10:00	9.655				14:10:00	1.72				14:10:00	5.54				14:10:00	110.63
14:20:00	9.3375				14:20:00	1.52				14:20:00	5.39				14:20:00	111.18
14:30:00	9.29333				14:30:00	1.53				14:30:00	5.6				14:30:00	112.875
14:40:00	9.17083				14:40:00	1.68				14:40:00	5.51				14:40:00	114.545
14:50:00	9.505				14:50:00	1.62				14:50:00	5.65				14:50:00	115.53
15:00:00	9.77667				15:00:00	1.7				15:00:00	5.77				15:00:00	118.205
15:10:00	9.92417				15:10:00	1.65				15:10:00	6.24				15:10:00	118.12
15:20:00	10.13				15:20:00	1.68				15:20:00	6.58				15:20:00	122.155
15:30:00	10.3708				15:30:00	1.5				15:30:00	7.24				15:30:00	126.855
15:40:00	10.475				15:40:00	1.48				15:40:00	7.83				15:40:00	128.85
15:50:00	10.8317				15:50:00	1.56				15:50:00	8.34				15:50:00	132.135
16:00:00	11.8042				16:00:00	1.65				16:00:00	8.35				16:00:00	135.03
16:10:00	11.62				16:10:00	1.65				16:10:00	8.37				16:10:00	140.755
16:20:00	11.4892				16:20:00	1.57				16:20:00	9.34				16:20:00	143.86
16:30:00	11.63				16:30:00	1.59				16:30:00	9.36				16:30:00	149.555
16:40:00	11.5608				16:40:00	1.49				16:40:00	10.44				16:40:00	158.66
16:50:00	11.5542				16:50:00	1.64				16:50:00	10.41				16:50:00	159.1
17:00:00	11.6033				17:00:00	1.4				17:00:00	9.47				17:00:00	170.455
17:10:00	12.2375				17:10:00	1.3				17:10:00	9.89				17:10:00	190.19
17:20:00	13.0467				17:20:00	1.45				17:20:00	10.32				17:20:00	209.445
17:30:00	13.0267				17:30:00	1.48				17:30:00	10.98				17:30:00	231.775
17:40:00	13.0692				17:40:00	1.5				17:40:00	11.42				17:40:00	250.51
17:50:00	13.7725				17:50:00	1.43				17:50:00	10.48				17:50:00	292.32
18:00:00	14.3967				18:00:00	1.31				18:00:00	11.37				18:00:00	303.315
	11.3138					3.16687					8.40403					149.314

## Sheet: Data of composition
This study
Ca2+	4.82111	3.49861	12.9121	13.6861	8.72948	0.0511469
Cl-	5.6425	6.8441	17.8111	34.3047	16.1506	0.0946281
F-	0.488611	0.133819	0.182083	0.938889	0.435851	0.0025537
K+	2.55944	2.31501	15.0171	7.57444	6.8665	0.0402315
Mg2+	1.13861	0.650417	2.24472	2.42639	1.61503	0.00946266
Na+	13.7189	6.54917	10.5235	16.4283	11.805	0.0691665
NH4+	1.62111	4.87208	5.51583	16.2958	7.07622	0.0414603
NO3-	6.01028	29.3389	14.0229	32.6444	20.5041	0.120136
SO42-	77.0436	54.5547	81.415	176.954	97.4917	0.571214
					170.675
	In this study	Xiao 2013	Li 2009
Ca2+	0.0511469	0.0656651	0.0120155
Cl-	0.0946281	0.0192438	0.0108376
F-	0.0025537	0.00109723	0.001178
K+	0.0402315	0.0407664	0.0298033
Mg2+	0.00946266	0.0316509	0.00223819
Na+	0.0691665	0.157411	0.0232065
NH4+	0.0414603	0.0872721	0.209919
NO3-	0.120136	0.0638926	0.139239
SO42-	0.571214	0.533001	0.571563

## Sheet: Data of meteorology
Spring	Time	PM2.5	Wind speed	Summer	Time	PM2.5	Wind speed	Autumn	Time	PM2.5	Wind Speed	Winter	Time	PM2.5	Temp	Relative Humid	Wind Speed
	07:00:00	15.4	0.8		07:00:00	8.23	0		07:00:00	21.76	0		07:00:00	220.6	-6.55556	46.5	0
	07:10:00	14.76	0.68		07:10:00	8.09	0		07:10:00	20.44	0		07:05:00	225.4	-6.55556	46.52	0
	07:20:00	13.76	1.28		07:20:00	7.98	0		07:20:00	18.86	0.1		07:10:00	226.8	-6.57778	46.59	0
	07:30:00	13.12	0.5		07:30:00	7.33	0		07:30:00	16.75	0.12		07:15:00	239.7	-6.56111	46.69	0
	07:40:00	12.22	0		07:40:00	7.25	0		07:40:00	14.69	0.5		07:20:00	238.5	-6.60556	46.78	0
	07:50:00	12.755	0.2		07:50:00	7.01	0		07:50:00	11.94	0.2		07:25:00	219.49	-6.61111	46.89	0
	08:00:00	12.55	0		08:00:00	6.98	0		08:00:00	10.51	0.1		07:30:00	254.49	-6.61111	46.83	0
	08:10:00	14.1183	0.48		08:10:00	7.01	0		08:10:00	10.52	0.14		07:35:00	249.18	-6.61111	47.05	0
	08:20:00	14.4075	0.24		08:20:00	6.88	0		08:20:00	9.63	0.26		07:40:00	239.6	-6.61111	47.06	0
	08:30:00	13.5075	0.26		08:30:00	7.22	0		08:30:00	8.85	0.4		07:45:00	215.84	-6.61111	47.23	0
	08:40:00	14.2783	0.46		08:40:00	6.71	0		08:40:00	8.31	0.38		07:50:00	238.64	-6.61111	47.65	0
	08:50:00	12.0067	0.68		08:50:00	5.92	0.15		08:50:00	7.64	0.6		07:55:00	253.99	-6.63333	47.58	0
	09:00:00	10.7108	0.74		09:00:00	5.34	0.19		09:00:00	8.17	0.12		08:00:00	257.11	-6.66667	47.67	0
	09:10:00	10.4508	1.6		09:10:00	4.49	0.13		09:10:00	7.75	0.42		08:05:00	233.41	-6.66667	47.78	0
	09:20:00	11.2633	0.62		09:20:00	4.65	0.21		09:20:00	7.39	0.16		08:10:00	206.1	-6.66667	47.95	0
	09:30:00	12.2917	0.42		09:30:00	4.14	0.28		09:30:00	6.46	0		08:15:00	229.42	-6.66667	47.89	0
	09:40:00	12.5767	0.46		09:40:00	3.98	0.44		09:40:00	5.51	0.1		08:20:00	235.83	-6.66667	47.56	0
	09:50:00	12.2475	0		09:50:00	4.06	0.12		09:50:00	5.08	0		08:25:00	177.01	-6.66667	47.35	0
	10:00:00	11.9575	1.7		10:00:00	3.67	0.22		10:00:00	5.71	0		08:30:00	157.32	-6.66111	47.12	0
	10:10:00	12.1583	3.42		10:10:00	3.35	0.3		10:10:00	5.51	0.58		08:35:00	157.05	-6.52222	47.27	0
	10:20:00	12.0792	5.8		10:20:00	2.81	0.35		10:20:00	5.4	0.08		08:40:00	134.57	-6.21667	46.6	0
	10:30:00	12.0942	7.22		10:30:00	2.36	0.46		10:30:00	5.43	0		08:45:00	166.76	-5.83333	45.5	0
	10:40:00	12.2675	9.42		10:40:00	2.53	0.16		10:40:00	5.8	0		08:50:00	133.33	-5.48889	44.34	0
	10:50:00	12.3892	6.88		10:50:00	2.98	0.18		10:50:00	6.19	0		08:55:00	120.74	-5.15556	43.42	0
	11:00:00	11.4317	7.9		11:00:00	3.11	0.37		11:00:00	6.47	0.28		09:00:00	117.12	-4.88333	42.67	0
	11:10:00	10.4617	7.42		11:10:00	2.72	0.24		11:10:00	7.08	0.26		09:05:00	119.86	-4.63889	41.93	0
	11:20:00	9.55333	3.22		11:20:00	2.41	0.47		11:20:00	7.1	0.48		09:10:00	123.09	-4.42222	41.32	0
	11:30:00	8.63583	3.96		11:30:00	2.27	0.34		11:30:00	7.2	0.28		09:15:00	121.9	-4.23333	40.81	0
	11:40:00	7.5025	6.94		11:40:00	2.35	0.82		11:40:00	7.44	0.58		09:20:00	118.24	-4.07778	40.36	0
	11:50:00	7.4	5.26		11:50:00	2.16	0.81		11:50:00	8.84	0.68		09:25:00	120.09	-3.93333	39.98	0
	12:00:00	6.555	5.3		12:00:00	2.09	0.3		12:00:00	9.2	0.46		09:30:00	115.31	-3.80556	39.61	0
	12:10:00	6.50917	5.34		12:10:00	2.08	0.44		12:10:00	8.97	0		09:35:00	118.2	-3.68333	39.14	0
	12:20:00	6.36333	3.36		12:20:00	2.4	0.07		12:20:00	7.76	0		09:40:00	134.21	-3.57778	38.69	0
	12:30:00	10.1192	6.5		12:30:00	2.18	0.17		12:30:00	6.88	0		09:45:00	150.25	-3.48889	38.49	0
	12:40:00	12.8617	6.42		12:40:00	2.24	0		12:40:00	6.35	0		09:50:00	131.35	-3.43333	38.48	0
	12:50:00	12.1208	6.82		12:50:00	2.15	0		12:50:00	5.99	0.4		09:55:00	126.14	-3.32778	38.23	0
	13:00:00	11.645	10.4		13:00:00	2.09	0.26		13:00:00	6.14	0		10:00:00	121.08	-3.25556	38.1	0
	13:10:00	10.6717	7.78		13:10:00	2.44	0.52		13:10:00	6.01	0.2		10:05:00	114.21	-3.20556	38.03	0
	13:20:00	11.2742	6.58		13:20:00	2.49	0.72		13:20:00	5.92	0		10:10:00	112.08	-3.15	37.98	0
	13:30:00	10.7925	8.46		13:30:00	2.08	0.47		13:30:00	5.42	0.46		10:15:00	113.13	-3.11111	37.96	0
	13:40:00	10.4783	6.84		13:40:00	2.09	0.39		13:40:00	5.45	0		10:20:00	112.21	-3.06111	37.9	0
	13:50:00	9.45417	5.6		13:50:00	2.21	0.39		13:50:00	5.36	0.2		10:25:00	113.26	-3.01111	37.83	0
	14:00:00	9.54417	6.02		14:00:00	2.55	0.8		14:00:00	5.3	0.1		10:30:00	115.74	-2.97222	37.74	0
	14:10:00	9.655	6.72		14:10:00	1.72	0.65		14:10:00	5.54	0.16		10:35:00	121.79	-2.94444	37.76	0
	14:20:00	9.3375	8.8		14:20:00	1.52	0.78		14:20:00	5.39	0		10:40:00	121.84	-2.89444	37.7	0
	14:30:00	9.29333	4.64		14:30:00	1.53	0.81		14:30:00	5.6	0		10:45:00	119.91	-2.83889	37.59	0
	14:40:00	9.17083	7.44		14:40:00	1.68	0.46		14:40:00	5.51	0		10:50:00	119.88	-2.81667	37.55	0
	14:50:00	9.505	7.22		14:50:00	1.62	0.44		14:50:00	5.65	0		10:55:00	118.89	-2.77778	37.4	0
	15:00:00	9.77667	8.74		15:00:00	1.7	0.67		15:00:00	5.77	0.1		11:00:00	119.29	-2.72222	37.38	0
	15:10:00	9.92417	7.04		15:10:00	1.65	0		15:10:00	6.24	0		11:05:00	121.82	-2.70556	37.32	0
	15:20:00	10.13	6.68		15:20:00	1.68	0.44		15:20:00	6.58	0		11:10:00	120.94	-2.66667	37.27	0
	15:30:00	10.3708	6.2		15:30:00	1.5	0.21		15:30:00	7.24	0		11:15:00	117.54	-2.63333	37.18	0
	15:40:00	10.475	6.48		15:40:00	1.48	0.21		15:40:00	7.83	0.18		11:20:00	118.69	-2.61111	37.14	0
	15:50:00	10.8317	5.78		15:50:00	1.56	0.25		15:50:00	8.34	0		11:25:00	119.53	-2.59444	37.11	0
	16:00:00	11.8042	6.98		16:00:00	1.65	0.49		16:00:00	8.35	0.2		11:30:00	116.36	-2.55556	37.07	0
	16:10:00	11.62	5.58		16:10:00	1.65	0.3		16:10:00	8.37	0.14		11:35:00	115.64	-2.53333	37.01	0
	16:20:00	11.4892	5.94		16:20:00	1.57	0.43		16:20:00	9.34	0.08		11:40:00	115.7	-2.5	36.98	0
	16:30:00	11.63	6.74		16:30:00	1.59	0		16:30:00	9.36	0.06		11:45:00	115.91	-2.49444	36.9	0
	16:40:00	11.5608	5.58		16:40:00	1.49	0.11		16:40:00	10.44	0		11:50:00	114.7	-2.44444	36.89	0
	16:50:00	11.5542	4.46		16:50:00	1.64	0.14		16:50:00	10.41	0		11:55:00	116.66	-2.44444	36.87	0
	17:00:00	11.6033	7.44		17:00:00	1.4	0.16		17:00:00	9.47	0		12:00:00	118.77	-2.40556	36.74	0
	17:10:00	12.2375	5.24		17:10:00	1.3	0		17:10:00	9.89	0		12:05:00	115.26	-2.38889	36.71	0
	17:20:00	13.0467	4.34		17:20:00	1.45	0.1		17:20:00	10.32	0		12:10:00	114.28	-2.38889	36.72	0
	17:30:00	13.0267	5.16		17:30:00	1.48	0.05		17:30:00	10.98	0		12:15:00	113.07	-2.38889	36.63	0
	17:40:00	13.0692	4.94		17:40:00	1.5	0		17:40:00	11.42	0		12:20:00	111.42	-2.38889	36.62	0
	17:50:00	13.7725	4.96		17:50:00	1.43	0.06		17:50:00	10.48	0		12:25:00	112.66	-2.37778	36.61	0
	18:00:00	14.3967	4.12		18:00:00	1.31	0		18:00:00	11.37	0		12:30:00	114.25	-2.33333	36.6	0
													12:35:00	111.76	-2.33333	36.63	0
													12:40:00	110.04	-2.33333	36.6	0
													12:45:00	109.79	-2.33333	36.63	0
													12:50:00	105.4	-2.30556	36.59	0
													12:55:00	104.77	-2.27778	36.53	0
													13:00:00	107.67	-2.27778	36.55	0
													13:05:00	107.74	-2.27778	36.52	0
													13:10:00	105.96	-2.27778	36.47	0
													13:15:00	106.96	-2.26111	36.47	0
													13:20:00	106.73	-2.23333	36.49	0
													13:25:00	109.45	-2.3	36.27	0
													13:30:00	107.34	-2.5	35.98	0
													13:35:00	107.75	-2.8	36.21	0
													13:40:00	108.58	-3.10556	37.02	0
													13:45:00	111.33	-3.41667	37.74	0
													13:50:00	110.21	-3.69444	38.42	0
													13:55:00	109.35	-3.92222	39.06	0
													14:00:00	111.38	-4.12222	39.39	0
													14:05:00	110.8	-4.30556	39.3	0
													14:10:00	110.46	-4.47778	39.38	0
													14:15:00	110.97	-4.62778	39.58	0
													14:20:00	111.39	-4.77778	39.81	0
													14:25:00	112.04	-4.9	40.15	0
													14:30:00	113.71	-5.02222	40.28	0
													14:35:00	114.32	-5.13333	40.62	0
													14:40:00	114.77	-5.20556	40.85	0
													14:45:00	115.13	-5.3	41.04	0
													14:50:00	115.93	-5.36667	41.32	0
													14:55:00	117.36	-5.46111	45.31	0
													15:00:00	119.05	-5.53889	44.83	0
													15:05:00	117.71	-5.63333	44.49	0
													15:10:00	118.53	-5.7	44.8	0
													15:15:00	120.56	-5.75	44.93	0
													15:20:00	123.75	-5.80556	44.88	0
													15:25:00	126.53	-5.87778	44.6	0
													15:30:00	127.18	-5.93333	45.02	0
													15:35:00	128.3	-5.97778	44.9	0
													15:40:00	129.4	-6.01111	44.95	0
													15:45:00	131.85	-6.05556	45.07	0
													15:50:00	132.42	-6.08333	45.07	0
													15:55:00	133.86	-6.11111	45.08	0
													16:00:00	136.2	-6.12778	44.99	0
													16:05:00	138.66	-6.16667	44.6	0
													16:10:00	142.85	-6.18333	44.11	0
													16:15:00	143.69	-6.22222	43.56	0
													16:20:00	144.03	-6.25	43.36	0
													16:25:00	145.35	-6.32778	42.88	0
													16:30:00	153.76	-6.38889	43.13	0
													16:35:00	155.86	-6.38889	43	0
													16:40:00	161.46	-6.36667	43.19	0
													16:45:00	157.42	-6.33333	42.88	0
													16:50:00	160.78	-6.34444	41.94	0
													16:55:00	163.77	-6.38889	41.42	0
													17:00:00	177.14	-6.38889	40.69	0
													17:05:00	187.87	-6.38889	40.73	0
													17:10:00	192.51	-6.38889	41.19	0
													17:15:00	202.18	-6.38889	41.09	0
													17:20:00	216.71	-6.38889	41	0
													17:25:00	236.26	-6.38889	41.12	0
													17:30:00	227.29	-6.38889	41.28	0
													17:35:00	249.01	-6.41111	41.22	0
													17:40:00	252.01	-6.44444	41.03	0
													17:45:00	294.84	-6.44444	40.9	0
													17:50:00	289.8	-6.44444	40.85	0
													17:55:00	288.55	-6.44444	40.85	0
													18:00:00	318.08	-6.44444	40.85	0

## Sheet: Data of Removal
			Time Periods
			07:00-09:30	09:30-12:00	12:00-15:00	15:00-18:00
		Spring	0.486285	0.437341	0.596837	0.566799
		Summer	0.713103	0.461245	0.410006	0.389336
		Fall	0.600105	0.446447	0.503044	0.616503
		Winter	0.598378	0.345337	0.392822	0.636865

## Sheet: Data of bare land
		Time	Spring	Summer	Autumn	Winter
			0.653237	-0.247485	0.309259	-0.162944
			0.869451	0.584297	0.302184	0.683093
			0.841034	0.647097	-0.137614	0.672952
			0.890575	0.0678319	-0.589483	-1.19397
